# Supplementary material
Source: publisher site journal article supplement (https://www.dovepress.com/article/587638)
Supplement: Supplementary file 1 [file 587638%20Supplementary%20Materials.docx]

**Supplementary Tables**

**Table S1. Weighted descriptive characteristics across sleep duration in NHANES 2011-2018.**

| **Variable** | **Total (N=816,177,843)*** | **SD: <5 h**  **(N=30,673,650)*** | **LS: 5≤X<7 h**  **(N=221,523,854)*** | **RS: 7≤X<9 h**  **(N=563,980,338)*** | ***P*** |
| --- | --- | --- | --- | --- | --- |
| **Sleep duration** | 7.08 (0.02) | 3.78 (0.03) | 5.82 (0.01) | 7.75 (0.01) | / |
| **Age** | 47.81 (0.31) | 47.75 (0.69) | 46.51 (0.34) | 48.32 (0.36) | **<0.001** |
| <30 | 2,956 (17.52%) | 108 (13.09%) | 804 (16.70%) | 2,044 (18.08%) | **<0.001** |
| 30≤X<60 | 9,565 (55.79%) | 497 (62.13%) | 3,117 (62.31%) | 5,951 (52.88%) |  |
| ≥60 | 6,084 (26.69%) | 296 (24.78%) | 1,553 (20.99%) | 4,235 (29.04%) |  |
| **Gender** |  |  |  |  | **<0.001** |
| Male | 9,151 (48.80%) | 446 (48.02%) | 2,822 (53.11%) | 5,883 (47.15%) |  |
| Female | 9,454 (51.20%) | 455 (51.98%) | 2,652 (46.89%) | 6,347 (52.85%) |  |
| **Race** |  |  |  |  | **<0.001** |
| Mexican American | 2,522 (8.54%) | 87 (7.74%) | 688 (8.96%) | 1,747 (8.42%) |  |
| Other Hispanic | 1,951 (6.29%) | 101 (7.74%) | 609 (7.32%) | 1,241 (5.81%) |  |
| Non-Hispanic white | 6,941 (65.63%) | 266 (53.33%) | 1,766 (60.05%) | 4,909 (68.50%) |  |
| Non-Hispanic black | 4,101 (10.76%) | 335 (22.50%) | 1,547 (15.09%) | 2,219 (8.41%) |  |
| Other race (including multi-racial) | 3,090 (8.78%) | 112 (8.69%) | 864 (8.57%) | 2,114 (8.86%) |  |
| **BMI** | 29.29 (0.12) | 30.49 (0.32) | 29.88 (0.16) | 29.00 (0.12) | **<0.001** |
| Underweight | 280 (1.40%) | 21 (2.06%) | 71 (1.33%) | 188 (1.39%) | **<0.001** |
| Normal | 5,062 (27.15%) | 192 (20.90%) | 1,374 (24.90%) | 3,496 (28.38%) |  |
| Overweight | 6,011 (32.60%) | 270 (30.16%) | 1,736 (32.16%) | 4,005 (32.90%) |  |
| Obese | 7,252 (38.85%) | 418 (46.88%) | 2,293 (41.60%) | 4,541 (37.34%) |  |
| **Marital status** |  |  |  |  | **<0.001** |
| Married | 9,622 (55.81%) | 361 (42.65%) | 2,747 (53.20%) | 6,514 (57.55%) |  |
| Divorced | 2,032 (10.25%) | 141 (15.88%) | 660 (11.64%) | 1,231 (9.39%) |  |
| Living with partner | 1,515 (8.18%) | 94 (11.06%) | 424 (8.43%) | 997 (7.93%) |  |
| Never married | 3,478 (18.12%) | 201 (20.56%) | 1,040 (18.80%) | 2,237 (17.72%) |  |
| Separated/windowed | 1,958 (7.64%) | 104 (9.85%) | 603 (7.92%) | 1,251 (7.41%) |  |
| **Educational level** |  |  |  |  | **<0.001** |
| <High school | 3,925 (13.37%) | 233 (19.67%) | 1,146 (14.58%) | 2,546 (12.55%) |  |
| High school/GED | 4,098 (22.03%) | 250 (32.07%) | 1,229 (23.72%) | 2,619 (20.82%) |  |
| Some college | 5,787 (32.37%) | 298 (32.76%) | 1,841 (35.71%) | 3,648 (31.04%) |  |
| >College | 4,795 (32.23%) | 120 (15.50%) | 1,258 (25.99%) | 3,417 (35.59%) |  |
| **Smoke** |  |  |  |  | **<0.001** |
| Never | 10,693 (56.85%) | 415 (45.05%) | 3,032 (53.08%) | 7,246 (58.98%) |  |
| Former | 4,348 (24.69%) | 184 (20.10%) | 1,223 (23.44%) | 2,941 (25.44%) |  |
| Now | 3,553 (18.45%) | 301 (34.85%) | 1,216 (23.48%) | 2,036 (15.58%) |  |
| **Diabetes** |  |  |  |  | **0.014** |
| No | 16,082 (89.86%) | 751 (87.87%) | 4,678 (88.73%) | 10,653 (90.42%) |  |
| Yes | 2,513 (10.14%) | 150 (12.13%) | 793 (11.27%) | 1,570 (9.58%) |  |
| **Stroke** |  |  |  |  | **<0.001** |
| No | 17,932 (97.37%) | 835 (93.15%) | 5,289 (97.74%) | 11,808 (97.45%) |  |
| Yes | 657 (2.57%) | 63 (6.29%) | 182 (2.24%) | 412 (2.49%) |  |
| **Coronary heart disease** |  |  |  |  | 0.20 |
| No | 17,834 (96.63%) | 856 (96.47%) | 5,260 (97.08%) | 11,718 (96.47%) |  |
| Yes | 714 (3.37%) | 38 (3.53%) | 203 (2.92%) | 473 (3.53%) |  |
| **CBC count (103/μL)** |  |  |  |  |  |
| WBC | 7.26 (0.04) | 7.46 (0.11) | 7.41 (0.06) | 7.20 (0.04) | **<0.001** |
| Lym | 2.15 (0.02) | 2.26 (0.05) | 2.21 (0.04) | 2.12 (0.01) | **<0.001** |
| Mono | 0.57 (0.00) | 0.58 (0.01) | 0.58 (0.01) | 0.57 (0.00) | 0.43 |
| Neu | 4.30 (0.03) | 4.36 (0.08) | 4.38 (0.04) | 4.26 (0.03) | **0.023** |
| Eosi | 0.20 (0.00) | 0.20 (0.01) | 0.20 (0.00) | 0.20 (0.00) | **0.012** |
| Baso | 0.05 (0.00) | 0.05 (0.00) | 0.05 (0.00) | 0.05 (0.00) | 0.25 |
| PLT | 238.26 (1.00) | 239.50 (3.25) | 239.88 (1.47) | 237.55 (1.03) | 0.19 |
| **CBC inflammatory index** |  |  |  |  |  |
| MLR | 0.29 (0.00) | 0.28 (0.00) | 0.28 (0.00) | 0.29 (0.00) | **0.004** |
| NLR | 2.19 (0.02) | 2.11 (0.05) | 2.19 (0.03) | 2.20 (0.02) | 0.28 |
| PLR | 121.67 (0.72) | 115.90 (1.87) | 119.77 (1.01) | 122.73 (0.78) | **<0.001** |
| NMLR | 2.48 (0.02) | 2.39 (0.05) | 2.47 (0.03) | 2.49 (0.02) | 0.25 |
| SIRI | 1.27 (0.01) | 1.24 (0.03) | 1.28 (0.02) | 1.27 (0.02) | 0.70 |
| SII | 522.30 (4.74) | 503.50 (11.35) | 523.47 (7.15) | 522.86 (5.34) | 0.21 |
| PIV | 308.27 (3.53) | 301.74 (8.71) | 310.59 (4.82) | 307.71 (4.09) | 0.42 |

*The data are presented as numbers that have been weighted for a national estimate.

Values with *p* < 0.05 are shown in bold.

**Abbreviations:** BMI, body mass index; Lym, Lymphocytes; Mono, Monocytes; Neu, Neutrophils; Eosi, Eosinophils; Baso, Basophils; PLT, Platelets; MLR, Monocyte-to-lymphocyte ratio; NLR, Neutrophil-to-lymphocyte ratio; PLR, Platelet-to-lymphocyte ratio; NMLR, Neutrophil-tomonocyte-plus-lymphocyte ratio; PIV, Pan-immune-inflammation value; SII, Systemic immune inflammatory index; SIRI, Systemic inflammation response index.

**Table S2. The association between CBC counts and trouble sleeping.**

| **CBC counts** | **Unadjusted** | | **Model 1** | | **Model 2** | |
| --- | --- | --- | --- | --- | --- | --- |
| **OR (95% CI)** | ***P*** | **OR (95% CI)** | ***P*** | **OR (95% CI)** | ***P*** |
| WBC | 1.04 (1.02, 1.07) | **0.002** | 1.01 (0.99, 1.03) | 0.424 | 0.61 (0.25, 1.48) | 0.266 |
| Lym | 1.00 (0.98, 1.01) | 0.808 | 0.99 (0.96, 1.02) | 0.34 | 1.57 (0.65, 3.77) | 0.307 |
| Mono | 1.62 (1.26, 2.08) | **<0.001** | 1.28 (1.00, 1.63) | 0.052 | 1.95 (0.79, 4.77) | 0.141 |
| Neu | 1.08 (1.05, 1.11) | **<0.001** | 1.03 (1.00, 1.06) | **0.035** | 1.66 (0.69, 4.01) | 0.253 |
| Eosi | 1.48 (1.15, 1.92) | **0.003** | 1.17 (0.89, 1.54) | 0.258 | 1.73 (0.66, 4.54) | 0.255 |
| Baso | 8.43 (4.11, 17.28) | **<0.001** | 2.44 (1.07, 5.58) | **0.035** | 2.41 (0.90, 6.48) | 0.08 |
| PLT | 1.00 (1.00, 1.00) | **0.003** | 1.00 (1.00, 1.00) | 0.088 | 1.00 (1.00, 1.00) | 0.285 |

Values with *p* < 0.05 are shown in bold.

Model 1: Adjusted for Age, gender, BMI, marital status, educational level, and smoke.

Model 2: Adjusted for Age, gender, BMI, marital status, educational level, smoke, and other blood counts (eg., SIRI was adjusted for Age, gender, BMI, marital status, educational level, smoke, WBC, Eosi, Baso, and PLT).


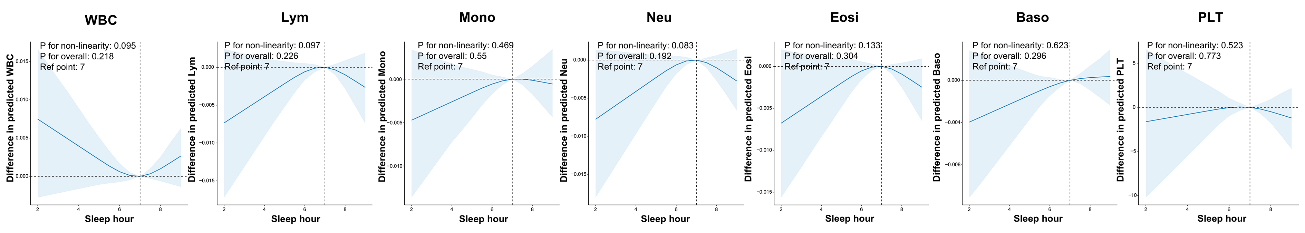
**Supplementary Figure**

**Figure S1.** Restricted cubic spline curves showing the relationships between sleep duration and CBC counts. OR (solid blue lines) and 95% confidence levels (shaded blue areas) were adjusted for Age, gender, BMI, marital status, educational level, smoke, diabetes, stroke, coronary heart disease, and other CBC counts.
